# Supplementary material for: Improved Glycemic Control in Adults With Serious Mental Illness and Diabetes With a Behavioral and Educational Intervention
Source: Atypon-hosted journal article supplement (doi:10.1176/appi.ps.201900336), 2020-04-23
Supplement: appi.ps.201900336.ds001.pdf [file appi.ps.201900336.ds001.pdf]

**Intervention**

The intervention was modeled after the Diabetes Prevention Program (1).

Online Curriculum - <https://www.cdc.gov/diabetes/prevention/resources/curriculum.html>

**Consort Diagram**

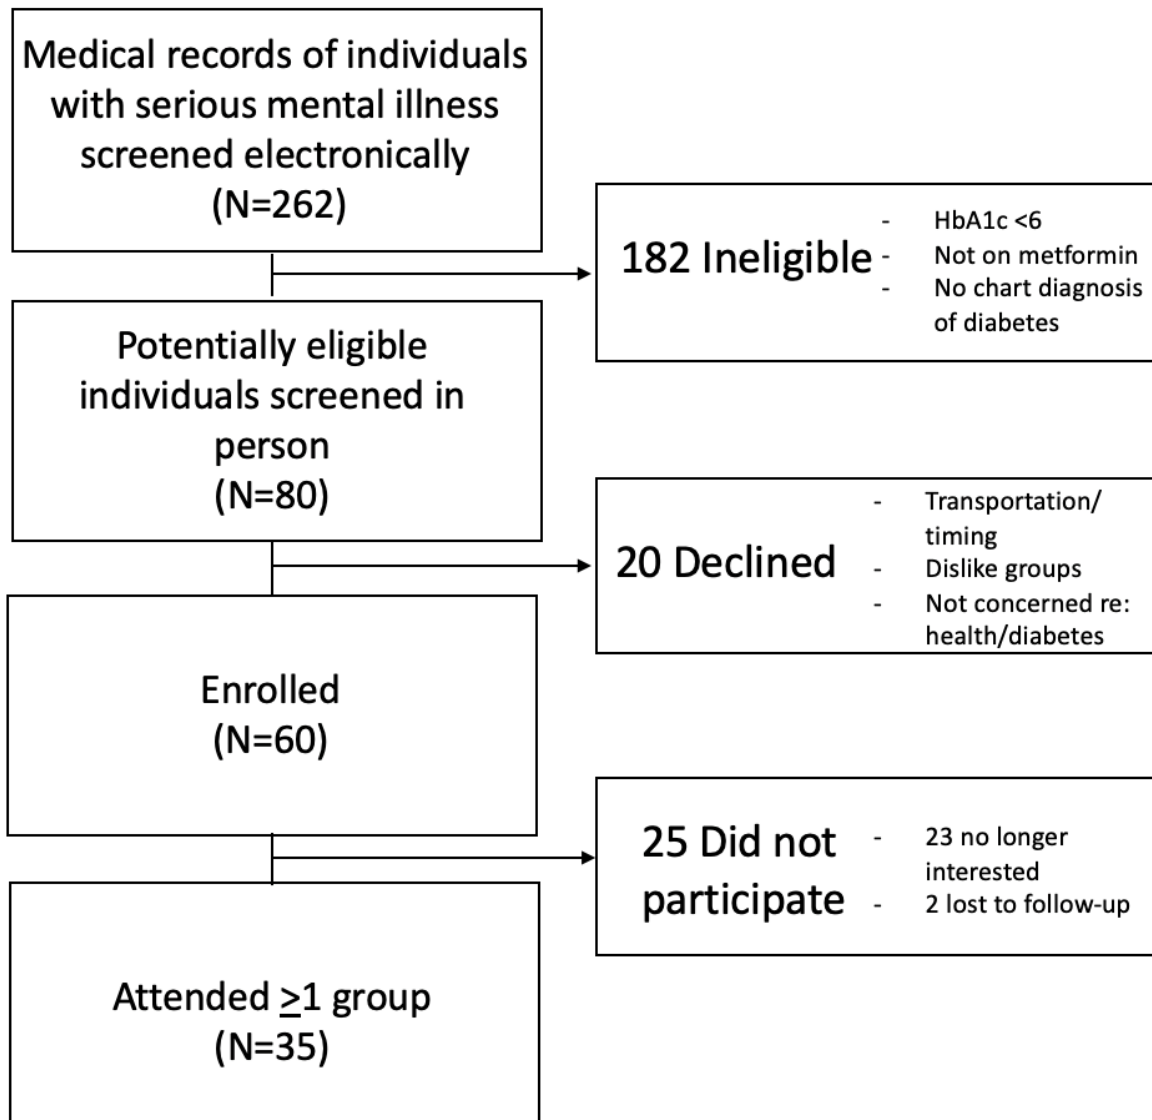

**Assessments**

Assessed at baseline:

- Clinical Global Impressions Scale (CGI) (2)

Measured weekly:

- Weight

- Systolic and diastolic blood pressure
- Step count

Measured at baseline and week 16:

- Lipid panel
- A1C

Assessed at weeks 1, 4, 8, 12, 16:

- Short Diabetes Knowledge Instrument (SDKI) (3)
- Summary of Diabetes Self-Care Activities (SDSCA) (4)
- Problem Areas in Diabetes (PAID) (5)

**Results**

There were no significant differences between participants who enrolled and attended at least one group versus those who enrolled but attended no groups ( $p's > 0.05$ ). However, we have low power to detect between group differences. Those who attended any groups were more likely to be non-white, more likely to be treated with an antipsychotic medication, more likely to be treated with olanzapine, and more likely to be treated with metformin and insulin and have a greater HbA1c than those who enrolled and attend none of the intervention.

**Baseline Characteristics of Study Participants**

|                                            | Attended<br>no groups<br>N = 25 | Attended 1 or<br>more groups<br>N = 35 |
|--------------------------------------------|---------------------------------|----------------------------------------|
| Age, years - M (SD)                        | 56.9 (12.2)                     | 52.9 (10.9)                            |
| Female - N (%)                             | 10 (40)                         | 8 (22.9)                               |
| Race/Ethnicity                             |                                 |                                        |
| White                                      | 16 (64)                         | 16 (45.7)                              |
| African American                           | 5 (20)                          | 12 (34.3)                              |
| Other race                                 | 3 (12)                          | 7 (20)                                 |
| Hispanic                                   | 1 (4)                           | 3 (8.6)                                |
| Clinical Global Impression-Severity M (SD) | 4.9 (1)                         | 4.8 (0.9)                              |
| Treatment - N (%)                          |                                 |                                        |
| Any antipsychotic                          | 12 (75)                         | 34 (97.1)                              |
| Clozapine                                  | 8 (50)                          | 14 (40)                                |
| Olanzapine                                 | 1 (6.2)                         | 8 (22.9)                               |
| Mood stabilizer                            | 4 (25)                          | 12 (34.3)                              |
| Antidepressant                             | 6 (37.5)                        | 10 (28.6)                              |
| Metformin                                  | 6 (37.5)                        | 23 (65.7)                              |
| Other oral diabetes medication             | 3 (18.8)                        | 12 (34.3)                              |
| Insulin                                    | 2 (12.5)                        | 9 (25.7)                               |
| Disease status - M(SD)                     |                                 |                                        |
| BMI                                        |                                 | 33.3 (3.8)                             |
| Systolic blood pressure, mmHg              |                                 | 127 (13)                               |

|                                                  | Attended<br>no groups<br>N = 25 | Attended 1 or<br>more groups<br>N = 35 |
|--------------------------------------------------|---------------------------------|----------------------------------------|
| Diastolic blood pressure, mmHg                   |                                 | 81 (11)                                |
| HbA1c, %                                         | 6.5 (1.1)                       | 7.5 (1.6)                              |
| Total cholesterol, mg/dL                         | 168 (41)                        | 160 (39)                               |
| HDL, mg/dL                                       | 41 (14)                         | 38 (15)                                |
| Average steps                                    |                                 | 5028 (4467)                            |
| Diabetes Self Care (SDSCA) <sup>a</sup> – M (SD) |                                 |                                        |
| General diet                                     |                                 | 3.5 (2.5)                              |
| Specific diet                                    |                                 | 3.2 (2.1)                              |
| Exercise                                         |                                 | 2.7 (2.5)                              |
| Foot care                                        |                                 | 4 (1.4)                                |
| Diabetes distress (PAID) <sup>b</sup> – M (SD)   |                                 | 41.8 (21.1)                            |
| Diabetes knowledge (SDKI) <sup>c</sup> – M (SD)  |                                 | 7.2 (2.7)                              |

<sup>a</sup> Summary of Diabetes Self-Care Activities Measure: multidimensional assessment of diabetes self-management, number corresponding to days per week activity is performed, range 0-7

<sup>b</sup> Problem Areas in Diabetes: 20-item questionnaire to query diabetes-related psychosocial distress, items rated from 1 ("no problem") to 6 ("serious problem"), score range 20-120

<sup>c</sup> Short Diabetes Knowledge Instrument: score range 0-13 with higher scores indicating greater knowledge

#### Data from baseline to end of treatment (week 16), n=35

| Variables                                                           | Baseline<br>(SD) | End of<br>Treatment<br>(SD) | Change | Estimated<br>population effect<br>$\beta$ (SD) | p-value |
|---------------------------------------------------------------------|------------------|-----------------------------|--------|------------------------------------------------|---------|
| <b>Physiologic measures</b>                                         |                  |                             |        |                                                |         |
| HbA1c, %                                                            | 7.5 (1.6)        | 7.1 (1.4)                   | -0.4   | -0.6 (0.26)                                    | 0.01*   |
| HbA1c, % (baseline $\geq$ 6.5%,<br>n=24)                            | 8.2 (1.5)        | 7.6 (1.3)                   | -0.6   | -0.63 (0.25)                                   | 0.008*  |
| Weight, lbs                                                         | 220.3 (40.9)     | 217.7<br>(42.6)             | -2.6   | -4.11 (0.91)                                   | 0.001*  |
| BMI, kg/m <sup>2</sup>                                              | 33.3 (3.8)       | 32.9 (4.1)                  | -0.4   | -0.75 (0.17)                                   | <0.001* |
| Total cholesterol, mg/dL                                            | 160 (39.2)       | 152.1<br>(39.3)             | -7.9   | -0.71 (2.17)                                   | 0.371   |
| HDL, mg/dL                                                          | 38.4 (14.9)      | 38.4<br>(12.7)              | 0      | -0.15 (1.07)                                   | 0.444   |
| HDL, mg/dL (baseline $\leq$ 40<br>mg/dL, n=22)                      | 30.4 (5.5)       | 32.8 (6.6)                  | 2.4    | 1.94 (0.89)                                    | 0.013*  |
| Systolic blood pressure, mmHg                                       | 126.6 (12.9)     | 122.7<br>(10.8)             | -3.9   | 0.11 (1.73)                                    | 0.474   |
| Systolic blood pressure,<br>mmHg (baseline<br>$\geq$ 130mmHg, n=10) | 141.8 (6.8)      | 128.9<br>(9.7)              | -12.9  | -3.43 (2.42)                                   | 0.081   |
| Diastolic blood pressure,<br>mmHg                                   | 81.2 (11.2)      | 79 (5.9)                    | -2.2   | -0.83 (1.26)                                   | 0.257   |
| Diastolic blood pressure,<br>mmHg (baseline $\geq$ 80mmHg,<br>n=17) | 90.6 (6.2)       | 78.5 (5.4)                  | -12.1  | -7.82 (1.66)                                   | <0.001* |

| Variables                                 | Baseline (SD) | End of Treatment (SD) | Change | Estimated population effect $\beta$ (SD) | p-value |
|-------------------------------------------|---------------|-----------------------|--------|------------------------------------------|---------|
| Steps per day                             | 5028 (4467)   | 5787 (4976)           | 759    | 0.12 (3.83)                              | 0.488   |
| <b>Diabetes knowledge &amp; self-care</b> |               |                       |        |                                          |         |
| Diabetes knowledge (SDKI)                 | 7.2 (2.7)     | 8.5 (2.7)             | 1.3    | 1.75 (0.42)                              | <0.001* |
| General diet self-care, days              | 3.5 (2.5)     | 4.6 (1.9)             | 1.1    | 1.21 (1.21)                              | 0.003*  |
| Specific diet self-care, days             | 3.2 (2.1)     | 4 (1.4)               | 0.8    | 0.96 (0.32)                              | 0.001*  |
| Exercise self-care, days                  | 2.7 (2.5)     | 4.1 (2.4)             | 1.4    | 1.09 (0.5)                               | 0.015*  |
| Foot self-care, days                      | 4 (1.4)       | 4.2 (1.4)             | 0.2    | 0.28 (0.25)                              | 0.129   |
| Diabetes distress (PAID)                  | 42 (21)       | 37 (18)               | -5     | -1.76                                    | 0.223   |

Note: A1C for participants who enrolled but attended no groups did not significantly change after four months: 6.5 (1.1) at baseline to 6.4 (0.8) at 16 weeks,  $\beta = -0.46$  (0.47),  $p = 0.156$ .

\*Comparisons considered significant at  $p < 0.022$

### Physiologic measures from baseline to week 16, n=35

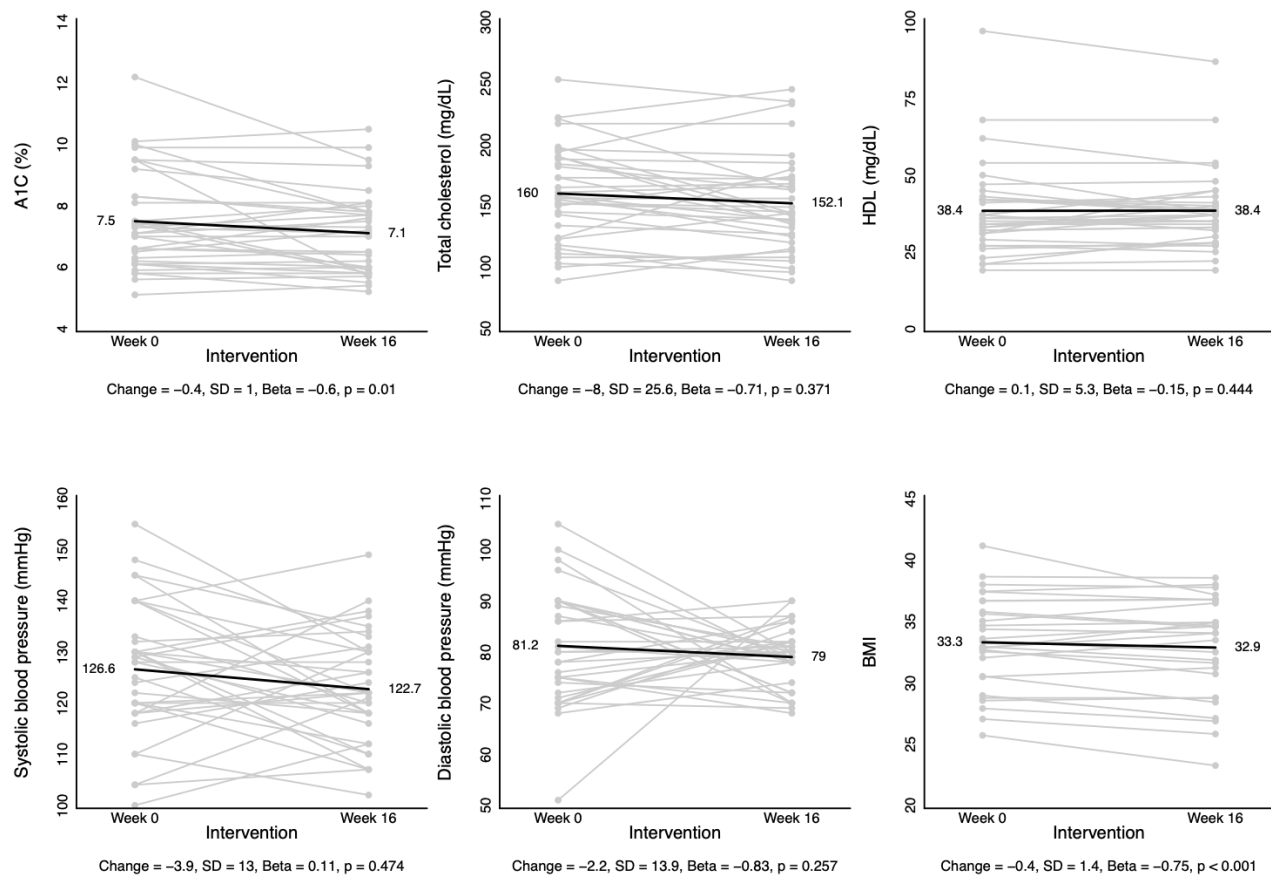

**Diagnostic results for mixed effects models (Kolmogorov-Sminorv test for normality of residuals and R<sup>2</sup>)**

| Outcome                                         | Distribution of residuals | R <sup>2</sup> |
|-------------------------------------------------|---------------------------|----------------|
| Diabetes knowledge                              | D = 0.06, p = 0.852       | 0.63           |
| Summed likert scores for stress due to diabetes | D = 0.11, p = 0.595       | 0.20           |
| Average days spent on general diet self-care    | D = 0.07, p = 0.852       | 0.42           |
| Average days spent on specific diet self-care   | D = 0.05, p = 0.852       | 0.50           |
| Average days spent on exercise self-care        | D = 0.07, p = 0.852       | 0.39           |
| Average days spent on foot self-care            | D = 0.06, p = 0.852       | 0.59           |
| HDL                                             | D = 0.09, p = 0.497       | 0.84           |
| LDL                                             | D = 0.07, p = 0.852       | 0.58           |
| Total cholesterol                               | D = 0.08, p = 0.709       | 0.45           |
| Triglycerides                                   | D = 0.15, p = 0.013*      | 0.50           |
| Systolic blood pressure                         | D = 0.03, p = 0.852       | 0.31           |
| Diastolic blood pressure                        | D = 0.05, p = 0.709       | 0.24           |
| Weight                                          | D = 0.11, p < 0.001*      | 0.98           |
| A1C                                             | D = 0.12, p = 0.094       | 0.40           |
| Average steps per day                           | D = 0.14, p < 0.001*      | 0.83           |
| BMI                                             | D = 0.12, p < 0.001*      | 0.95           |

\* Significant at p < .05 following Benjamini & Hochberg (1995) correction.

Four outcomes had tests indicating unusual distributions for residuals (see summary below of these flagged residuals and whether these represented over- or under-estimations). In these cases, we examined the distribution of residuals and flagged residuals that exceeded  $\pm 2$  standard deviations. We then refit the data using a variant of the mixed effects model robust to outliers, in which data are assumed to follow a student t distribution rather than a normal distribution (6). In all cases the significance and direction of effects did not change even when using the robust statistical approach, suggesting results were not affected by outliers/excessive variability.

- Triglycerides: 4 subjects had flagged residuals (1 was underestimated, 3 were overestimated), at 0, 8, 16, and 32 weeks.

- Weight: 8 subjects had flagged residuals (4 were underestimated, 4 were overestimated), at pre-intervention, and 1, 3, 13, and 32 weeks. Notably, one subject was consistently underestimated at all time points.
- Average steps per day: 2 subjects had flagged residuals (1 was underestimated, 1 was overestimated), over weeks 2, 4, 5, 6, and 16.
- BMI: 7 subjects had flagged residuals (3 were underestimated, 4 were overestimated), at pre-intervention and weeks 1, 3, 4, and 32. Notably, one subject was initially underestimated but his/her improvement was also underestimated.

## Citations

1. Diabetes Prevention Program Research G: The Diabetes Prevention Program (DPP): description of lifestyle intervention. *Diabetes Care* 25:2165-71, 2002
2. Busner J, Targum SDJP: The clinical global impressions scale: applying a research tool in clinical practice. 4:28, 2007
3. Quandt SA, Ip EH, Kirk JK, et al.: Assessment of a Short Diabetes Knowledge Instrument for Older and Minority Adults. *The Diabetes Educator* 40:68-76, 2014
4. Toobert DJ, Hampson SE, Glasgow RE: The summary of diabetes self-care activities measure: results from 7 studies and a revised scale. *Diabetes Care* 23:943-50, 2000
5. Polonsky WH, Anderson BJ, Lohrer PA, et al.: Assessment of Diabetes-Related Distress. *Diabetes Care* 18:754-60, 1995
6. Geweke, J: Bayesian Treatment of the Independent Student-t Linear Model. *Applied Econometrics* 8:S19-40, 1993
